# Supplementary material for: Poly(acrylonitrile)–molybdenum disulfide polymer electrolyte nanocomposite
Source: Royal Society of Chemistry journal article supplement (doi:10.1039/b601379a), 2006-01-01

### Electronic Supplementary Information

**Figure S1.** Scanning Electron Microscopy image of the product  $\text{Li}_{0.6}\text{MoS}_2(\text{PAN})_{1.2}$  showing the lamellar nature of the product.

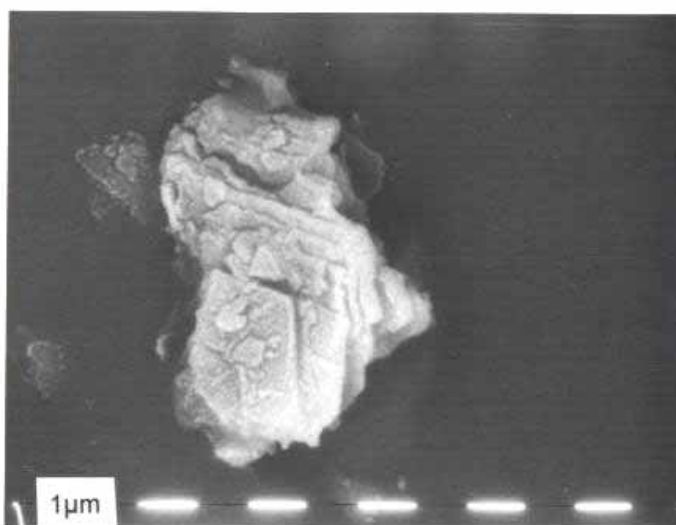

**Figure S2.**  $^7\text{Li}$  MAS-NMR spectrum of the nanocomposite  $\text{Li}_{0.6}\text{MoS}_2(\text{PAN})_{1.2}$  measured using  $\text{LiCl}$  as external standard. Only one symmetric, narrow signal is observed pointing to the presence an unique lithium species in the product.

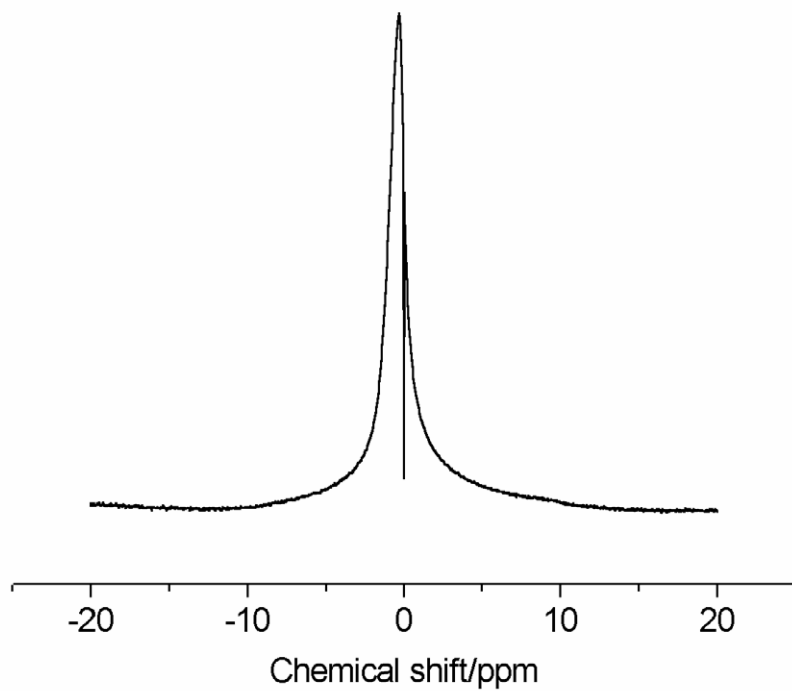

Supplement: b601379a.pdf [file b601379a.pdf]
